# Supplementary material for: Phenolphthalein Anilide Based Poly(Ether Sulfone) Block Copolymers Containing Quaternary Ammonium and Imidazolium Cations: Anion Exchange Membrane Materials for Microbial Fuel Cell
Source: MDPI journal article supplement (doi:10.3390/membranes11060454), 2021-06-20
Supplement: s1 [file s1]

# Phenolphthalein Anilide Based Poly(Ether Sulfone) Block Copolymers Containing Quaternary Ammonium and Imidazolium Cations: Anion Exchange Membrane Materials for Microbial Fuel Cell

Aruna Kumar Mohanty<sup>1</sup>, Young Eun Song<sup>2</sup>, Jung Rae Kim<sup>2</sup>, Nowon Kim<sup>3,\*</sup>, Hyun-jong Paik<sup>1,\*</sup>

<sup>1</sup> Department of Polymer Science and Engineering, Pusan National University, Busan, 46241, Korea.; akmo-hanty07@pusan.ac.kr

<sup>2</sup> School of Chemical and Biomolecular Engineering, Pusan National University, Busan, 46241, Korea.; duddms37@gmail.com (Y.E.S.); j.kim@pusan.ac.kr (J.R.K.)

<sup>3</sup> Department of Environmental Engineering, Dong-eui University, Busan, 47340, Korea.;

\* Correspondence: knwon@deu.ac.kr (N.K.); hpaik@pusan.ac.kr (H-j.P.)

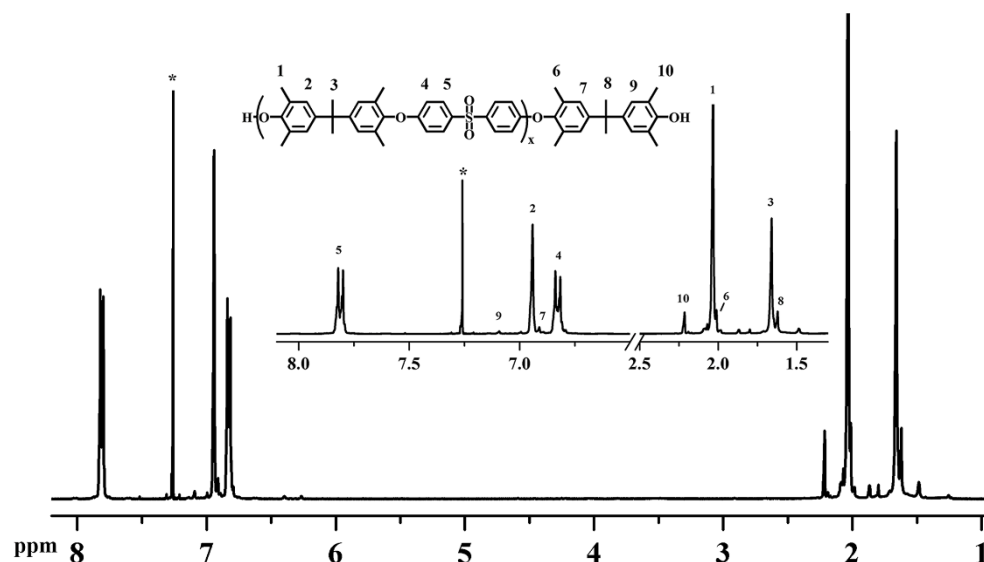

**Figure S1.** <sup>1</sup>H NMR spectrum of PES-1 recorded in CDCl<sub>3</sub> at 25 °C.

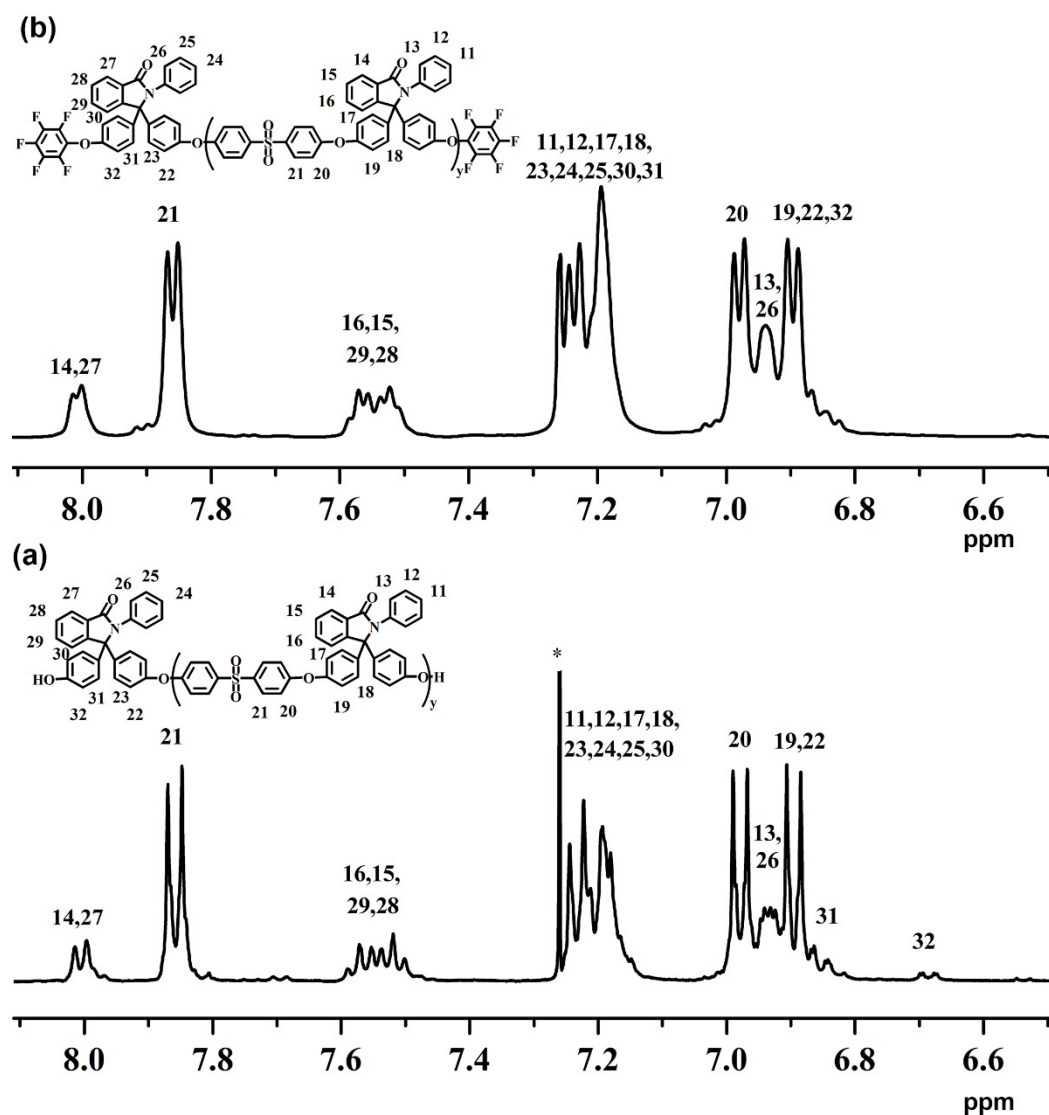

Figure S2.  $^1\text{H}$  NMR spectra of (a) PES-2 and (b) PES-3 recorded in  $\text{CDCl}_3$  at  $25^\circ\text{C}$ .

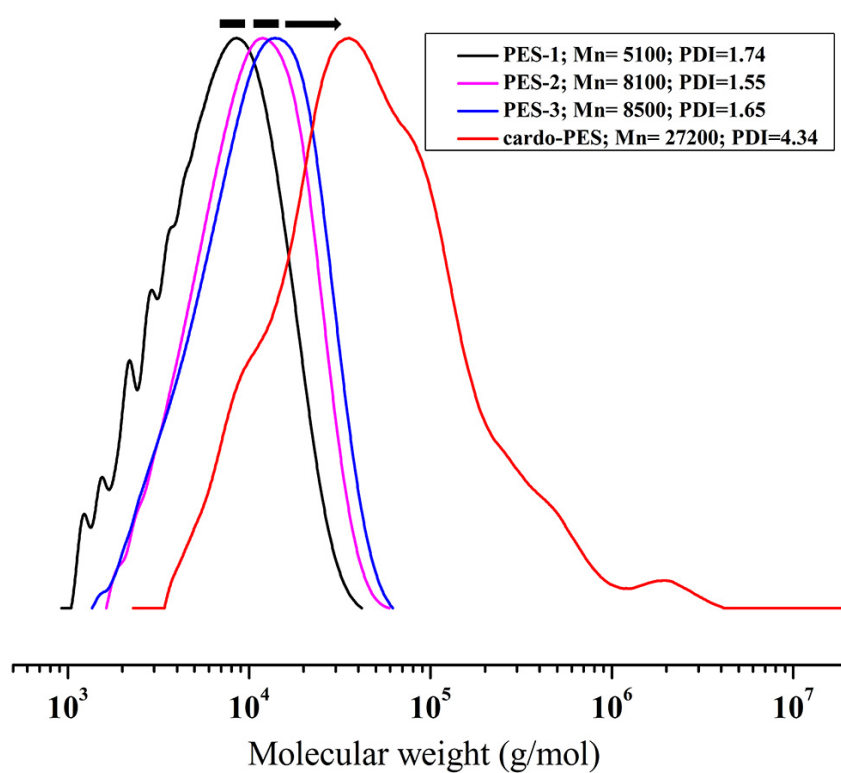

**Figure S3.** SEC traces of oligomers and precursor block copolymer.

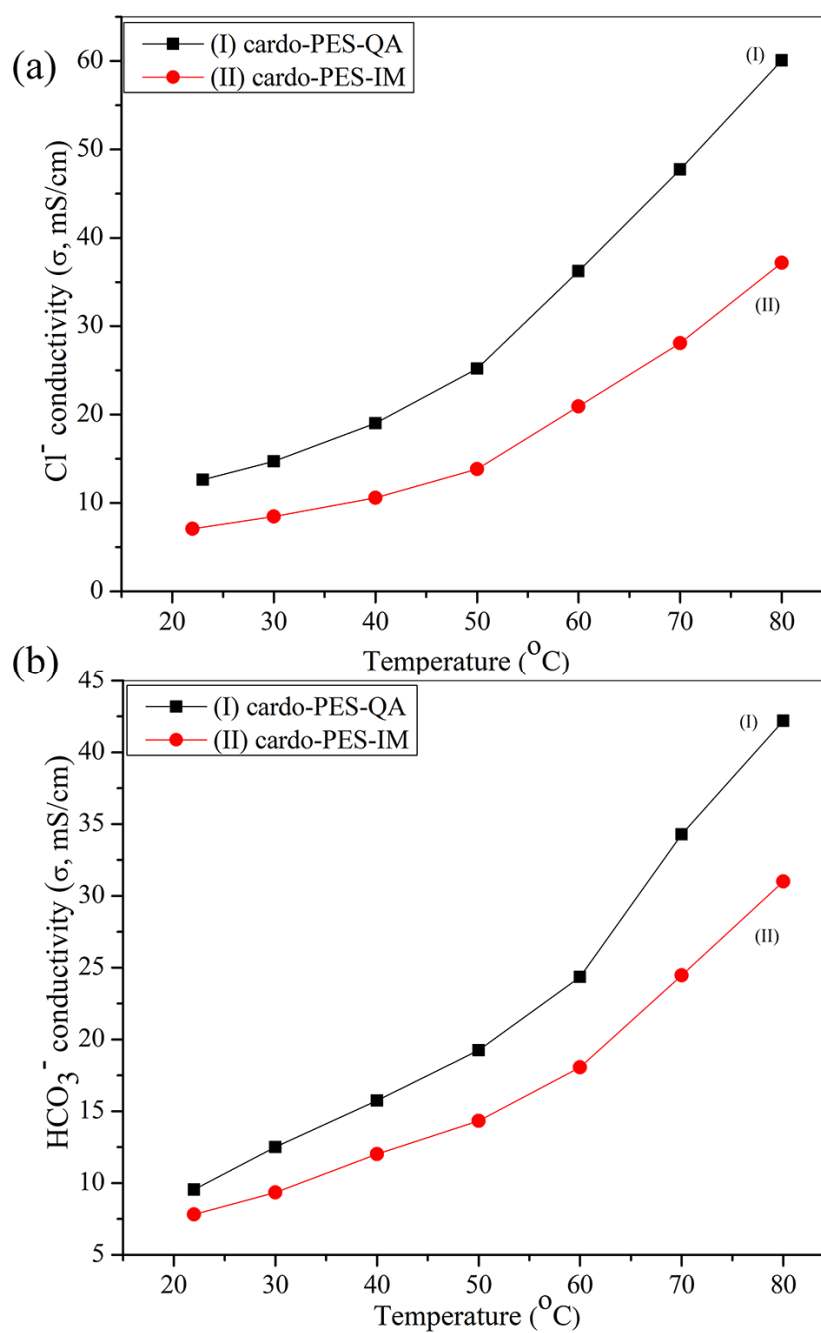

**Figure S4.** Temperature dependence of (a)  $\text{Cl}^-$  and (b)  $\text{HCO}_3^-$  conductivity of the AEMs.

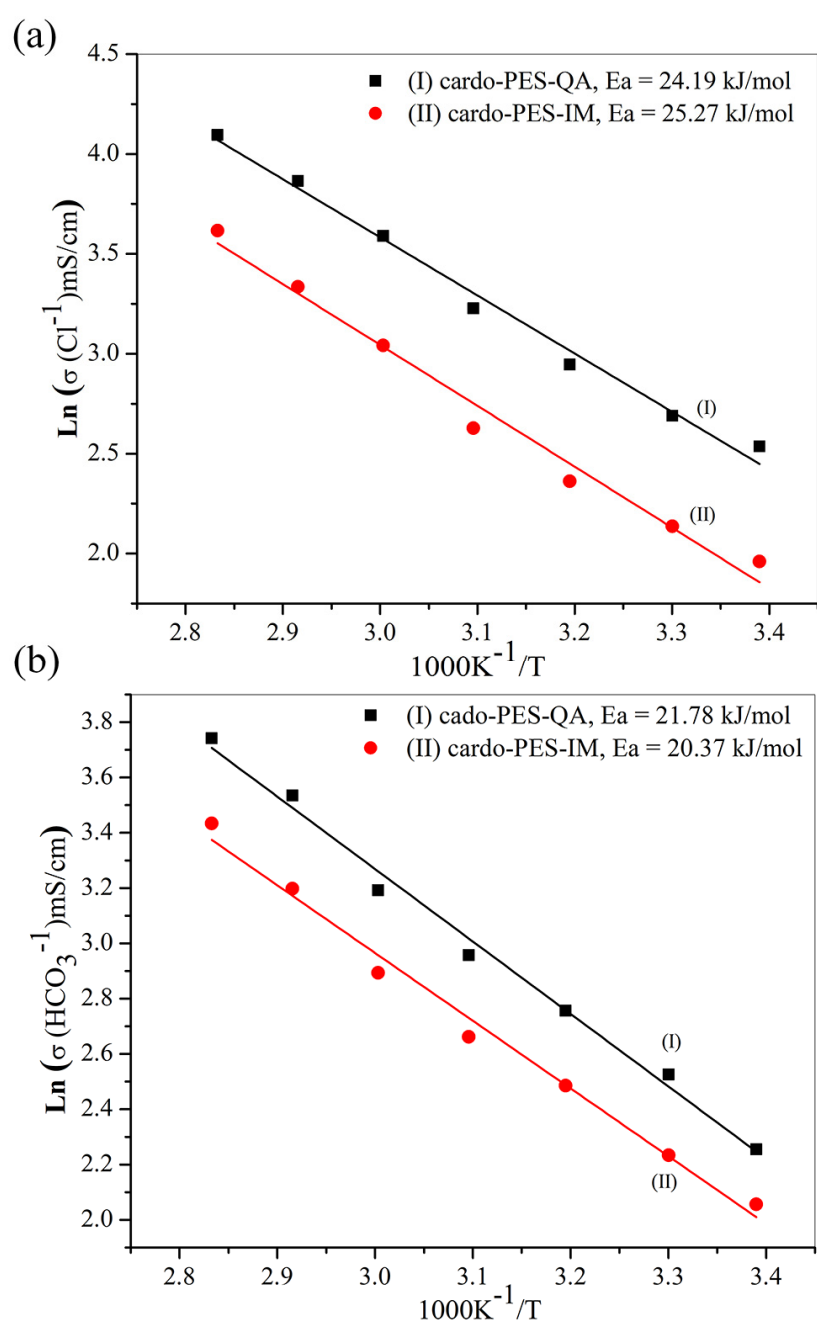

**Figure S5.** Arrhenius temperature dependence of (a) Cl-1 and (b) HCO<sub>3</sub>-1 conductivity ( $\sigma$ ) of the AEMs.
